# Supplementary material
Source: ML conference proceedings conference paper supplement (https://openaccess.thecvf.com/content/CVPR2023/html/Zhang_Real-Time_Controllable_Denoising_CVPR_2023_paper.html)
Supplement: Supplementary file 2 [file Zhang_Real-Time_Controllable_Denoising_CVPR_2023_supplemental.zip]

Archive with 3 entries (3 files):
- Demo_RCD_small.mp4
- RCD_appen.pdf
- README.md
