# Supplementary material
Source: ML conference proceedings conference paper supplement (https://openaccess.thecvf.com/content/CVPR2023/html/Zhang_Real-Time_Controllable_Denoising_CVPR_2023_paper.html)
Supplement: Supplementary file 2 [file Zhang_Real-Time_Controllable_Denoising_CVPR_2023_supplemental.zip › README.md]

### RCD Demo Video
We  provide demo video for showing features of RCD (Please see in attached file 'RCD-Demo.mp4'), which consists of three parts:

**1. Tuning Image Denoising Intensity**: RCD single image denoising results by tuning denoising levels.

**2. Tuning Image Perception under Fixed-level**: RCD single image denoising results by fixed-level(\sigma) tuning.

**3. Real-time Video Denoise Tuning**: Online tuning video denoising intensity with RCD.

### More Visualizations & Implementation Details

Please see in RCD_appen.pdf for details. 
